# Supplementary material for: Mutations in MITF and PAX3 Cause “Splashed White” and Other White Spotting Phenotypes in Horses
Source: PLoS Genet. 2012 Apr 12;8(4):e1002653. doi: 10.1371/journal.pgen.1002653 (PMC3325211; doi:10.1371/journal.pgen.1002653)
Supplement: Table S4 — Primer sequences. (XLS) [file pgen.1002653.s009.xls]

## Sheet: Tabelle1
Table S4. Primer sequences
Chromosome	Start	Stop	Gene	Exon	Forward primer	Sequence 5'-3'	Reverse Primer	Sequence 5'-3'	Tm (°C)	Product (bp)
	Build EcuCab 2.1	Build EcuCab 2.1
3	77809459	77809891	KIT	1	KIT_Ex1_IF	TAGCACGTCGAAAGAGCTG	KIT_Ex1_IR	CTTCCCGGAGGCTGAAAC	58	433
3	77773677	77774286	KIT	2	KIT_Ex2_IF	AAATAGGGCAGCTTTGTCC	KIT_Ex2_IR	TATCAGAGCCTTGCAGACC	58	610
3	77770811	77771420	KIT	3	KIT_Ex3_IF	GAGTCAGCAGCCATTTGAG	KIT_Ex3_IR	CCTAGCTGGAGGCAGTCAC	58	610
3	77769674	77770112	KIT	4	KIT_Ex4_IF	GGATGCGTGATTTAATTGC	KIT_Ex4_IR	CACACCAGCTGAGCCATC	56	439
3	77764757	77765324	KIT	5	KIT_Ex5_IF	TGACAGACTTGTCATGATGC	KIT_Ex5_R	GCTGCGTAAACAACGTCAG	56	568
3	77760283	77760736	KIT	6	KIT_Ex6_IF	GACAGTGATTCTGCAAGAGC	KIT_Ex6_IR	TTTACGGGTCACACGGTAG	58	454
3	77757992	77758450	KIT	7	KIT_Ex7_IF	ACATGACAGGCATTTGTCC	KIT_Ex7_IR	CGGGGTCTTTGTTAAGGTC	56	459
3	77744779	77745659	KIT	8	KIT_Ex8_IF	GGGGCTTCTCTTTTCCTG	KIT_Ex8_IR	CCCTGGAAAATTGCTTTATC	56	881
3	77743058	77743516	KIT	9	KIT_Ex9_IF	TGACATCAGCGTGTAAAAGG	KIT_Ex9_IR	GACAGTAGAACGCAATGCAG	58	459
3	77741264	77741832	KIT	10 + 11	KIT_Ex10_11_IF	GCTGTGAGATGGGAGGTG	KIT_Ex10_11_IR	CAAAGCTATCAAAGGTGGTG	58	569
3	77740590	77741283	KIT	12 + 13	KIT_Ex12_13_IF	CACCACCTTTGATAGCTTTG	KIT_Ex12_13_IR	TTTGGATGCAACATACGTG	56	694
3	77739152	77739765	KIT	14	KIT_Ex14_IF	CGGGTTTTGATAAGCAATG	KIT_Ex14_IR	CCACGATGAGAGAAACAGG	56	614
3	77737037	77737498	KIT	15	KIT_Ex15_IF	AAAGGCCATCTAGCTCCTG	KIT_Ex15_IR	CAACCCTTAACTGCCATTG	56	462
3	77736417	77737087	KIT	16	KIT_Ex16_IF	TTCACGTAGGGTCTCATGG	KIT_Ex16_IR	CCAAAGAGACAGCAGTTGG	58	671
3	77735153	77735750	KIT	17	KIT_Ex17_IF	TGGAGTTGGTTTTGAAAGTG	KIT_Ex17_IR	ACGTGCCCCATAATTACAC	56	598
3	77731398	77732227	KIT	18 + 19	KIT_Ex18_19_IF	TCATCTGAGGCCATACAGG	KIT_Ex18_19_IR	AAGGGCCATTTAGCATCAC	56	830
3	77731154	77731741	KIT	20	KIT_Ex20_IF	AAGGGCCAAGATGTGTTTC	KIT_Ex20_IR	GCCCAATTTATAGCCCAAG	56	588
3	77729680	77730464	KIT	21	KIT_Ex21_IF	GCTGTTGGGTTGTAGTTGG	KIT_Ex21_IR	CAACCATCCTTTTGGACAG	56	785
6	23607122	23607613	MLPH	1	MLPH_Ex1_F2	GAAACCCATTTACCCCAGGT	MLPH_Ex1_R2	GATGATGTCACCCCAGAAGC	60	492
6	23624505	23625349	MLPH	2+3	MLPH_Ex2-3F	CCAACTGTAAAAACAAGATGTCC	MLPH_Ex2-3R	ACAAAAATAGCCCCCTGGA	58	845
6	23629743	23630362	MLPH	4	MLPH_Ex4_F	TTTGCCCCCAGTCTTTCT	MLPH_Ex4_R	TCCCCTTGCTTGTGTTTATC	58	620
6	23631063	23631562	MLPH	5	MLPH_Ex5_F	GCTGACCTGACTCTCCTCCT	MLPH_Ex5_R	GGGCTTCTGCCTTACTTCTC	58	500
6	23632690	23633158	MLPH	6	MLPH_Ex6_F	ACTTGGGCTGGAAAGACC	MLPH_Ex6_R	AGGGAGAGCAGGTGTCAAC	58	469
6	23634743	23635303	MLPH	7	MLPH_Ex7_F	AAACAACCCAGAGTGACCAA	MLPH_Ex7_R	AAAGAAGCCACAAGGATGC	58	561
6	23639535	23639947	MLPH	8	MLPH_Ex8_F	ACCTCTCCCGCTTTATTCAT	MLPH_Ex8_R	CTCAACCCTCCTGACGAAG	58	413
6	23643185	23643909	MLPH	9+10	MLPH_Ex9-10F	TCTGAGTGTGCTGCTTGC	MLPH_Ex9-10R	ACTGTCTATCCTGGGGAACC	58	725
6	23645010	23645425	MLPH	11	MLPH_Ex11_F	CACTACCCCTTCTTCCATCC	MLPH_Ex11_R	CAACCTCCCCTGGTCTGT	58	416
6	23646107	23646678	MLPH	12	MLPH_Ex12_F	GGCAGAAAAATGAAAGATGC	MLPH_Ex12_R	CGCCAAGTTCCCACCTCT	58	572
6	23648014	23648414	MLPH	13	MLPH_Ex13_F	GTGCCAAAGAATGGAAGATG	MLPH_Ex13_R	GTGCCTACAGCAGCAAAGTC	58	401
6	23650363	23650835	MLPH	14	MLPH_Ex14_F	TTTCCTGTTGCTTTGGATTT	MLPH_Ex14_R	TTTCCCCAGTTTCTTGACTCT	58	473
6	23651435	23651894	MLPH	15	MLPH_Ex15_F	ACAGATTTTCCCACGCAGT	MLPH_Ex15_R	CACCATTTCCCCTTACACAT	58	460
6	23659973	23660397	MLPH	16	MLPH_Ex16_F	TGTCCATCACCATCACCA	MLPH_Ex16_R	TGGGAGAAGAGAGTTTGTGG	58	425
6	23663254	23663698	MLPH	17	MLPH_Ex17_F	GTTGCTCCTGCCCCTCTG	MLPH_Ex17_R	GGGAAAGCCAGTTCGTTC	58	445
6	23663943	23664368	MLPH	18	MLPH_Ex18_F	TTCTTGCTCTTTCCTTTCCA	MLPH_Ex18_R	GGTCCCAGTTCCCTTACTCA	58	426
6	11431107	11431329	PAX3	1	Pax3_Ex1_F	CTCGCCTATTTCGCTTTCAC	Pax3_Ex1_R	GAAGGAGCCTGTGGAGACC	60	223
6	11429573	11429916	PAX3	2	Pax3_Ex2_F	TGACTTTCCTCCTGCCTCTC	Pax3_Ex2_R	CTGCCCCATCTTCCCTAAC	60	344
6	11428085	11428342	PAX3	3	Pax3_Ex3_F	CTGGCCCAGAGTACTGGGTA	Pax3_Ex3_R	GTGATTATGGCTCGGACGAC	60	258
6	11426784	11427076	PAX3	4	Pax3_Ex4_R	AGTGTAACGCGCTCCCTTC	Pax3_Ex4_F	GAGCGAGGAAGCATCTTGAC	60	293
6	11369541	11369813	PAX3	5	Pax3_Ex5_F	TCCCACTTTATCACTTCTTTCCTC	Pax3_Ex5_R	AAGCAGGATGTGGGTGTTTG	60	273
6	11359762	11360045	PAX3	6	Pax3_Ex6_F	GGGGCCTTTAATCTGTTTTAGC	Pax3_Ex6_R	AACTCCTTGACTCCCTTCCTTC	60	284
6	11358643	11358981	PAX3	7	Pax3_Ex7_F	CTACTGATGGCTTGGTGACG	Pax3_Ex7_R	AGCAATCGTCTGTCTGGAAAC	60	339
6	11341076	11341547	PAX3	8	PAX3_EX8_F1	GGTCACTGTCTTCTGGACAGC	PAX3_EX8_R1	GGCCATATCCTGTTTGTTAAGG	60	472
6	11340311	11340733	PAX3	9 + 10	PAX3_EX9+10_F1	GTAGCTGATTTTGCCCCTTG	PAX3_EX9+10_R1	AATGGAATGTTTTAGCTCCTTGA	60	423
6	11340225	11340521	PAX3	10	PAX3_EX10_F2	TGACAGGAGACAAAGGAGAGTG	PAX3_EX10_R2	CATTCTGCTTGCACAAACCA	60	297
6	73672862	73673477	PMEL	1	PMEL17_Ex1F	ATTACATTCCACCTGGCTCA	PMEL17_Ex1R	CCCCAAATTCACACTTGTTC	58	616
6	73670503	73671136	PMEL	2+3	PMEL17_Ex2-3F	TGCTTCAGTGCCATGTCTTA	PMEL17_Ex2-3R	CCCTTAGAAGAGGGCCTAGA	58	634
6	73669012	73669832	PMEL	4+5	PMEL17_Ex4-5F	GTGTTCCAGAGCCCCTCTC	PMEL17_Ex4-5R	ACTGATCTTGCCCCTTCCTA	58	821
6	73668040	73668864	PMEL	6	PMEL17_Ex6F	AGGGTGTGGTTGTGAAAAGA	PMEL17_Ex6R	CCACCTCAGTGAACCTCGT	58	825
6	73665885	73666875	PMEL	7+8+9+10	PMEL17_Ex7-10F	CTCCTGATTTGCCTCTTCAA	PMEL17_Ex7-10R	AGGGATAAGGGGGTGTACG	58	991
6	73664851	73665453	PMEL	11	PMEL17_Ex11F	ATGAACCCTGTTTGTGAGGA	PMEL17_Ex11R	CTGCACCAACCTCCACTATT	58	603
14	26706373	26707081	SLC36A1	1	CH_Ex1_F2	AAGCGCCTGTCTGTCTCTTC	CH_Ex1_R	CTCTTCCTCAGCACCAGCTT	58	709
14	26700671	26701381	SLC36A1	2	CH_Ex2_F	CAGAGCCTAAGCCCAGTGTC	CH_Ex2_R	GGAGGACTGTGTGGAAATGG	57	711
14	26699749	26700444	SLC36A1	3	CH_Ex3_F	ATCCCAGGAGCCTCTGTTCT	CH_Ex3_R	GAAGCGTTAAGCCAACAGGA	60	696
14	26699256	26699954	SLC36A1	4	CH_Ex4_F	CAGCTGCTCAGCATCACAG	CH_Ex4_R	CAAAGCAGGAACAGCCCTTA	60	699
14	26697113	26697814	SLC36A1	5	CH_Ex5_F	CTCCTGCCATTCCAGTCTTG	CH_Ex5_R	AAGGCTCAGTGTGTGAACGA	60	702
14	26696532	26697216	SLC36A1	6	CH_Ex6_F	AACCCAGCTCAGACAGTTGG	CH_Ex6_R	CCAGAGACCTTTGGCAATGT	60	685
14	26692937	26693633	SLC36A1	7	CH_Ex7_F	TTTGTGCATGCTCCAACATT	CH_Ex7_R	GTCAAGTCCTCGTGCAAGGT	60	697
14	26690261	26690960	SLC36A1	8	CH_Ex8_F	CTTATCGCAGGAGGCAGAAC	CH_Ex8_R	GTCCCACATGGGTAACAAGG	60	700
14	26687322	26688020	SLC36A1	9	CH_Ex9_F	TATCGTGGAGCTGGTTGTGT	CH_Ex9_R	TTCTCTGCACCATCTGGACA	60	699
14	26678539	26679047	SLC36A1	10	CH_Ex10_F	CTTGCAGTGAGAGACAGGTTATTC	CH_Ex10_R	TGGGGAACATACAGCGGT	60	509
16	20274436	20274967	MITF	1C	MITF_Ex1C_F	GGCGACTGGAAAACACATT	MITF_Ex1C_R	TCCCTTTGACTCTGACCTGA	58	532
16	20181722	20182314	MITF	1H	MITF_Ex1H_F	CCTTCCCTTTCTCTGTCCTC	MITF_Ex1H_R	GCAATCCCACAACTCTGCTA	58	593
16	20169828	20170406	MITF	2A + 1B	MITF_Ex2A_1B_F	AATGTTGGGGAAGAGAGTTTG	MITF_Ex2A_1B_R	TGGTGGTGATGAGTAGTATGTGA	58	579
16	20116949	20117808	MITF	1M	MITF_Ex1M_F	GGTATCAAACAACAAACAGCATT	MITF_Ex1M_R	GCTAACTCCCTCTCTTCCTGA	58	860
16	20115661	20116326	MITF	2	MITF_Ex2_F2	AGAAGAAGGGCACAAGGTTT	MITF_Ex2_R2	CAGGGACAGCGACAAGAG	58	666
16	20114409	20114922	MITF	3	MITF_Ex3_F	TGAGGCACAGCATTTTACATT	MITF_Ex3_R	TCGTTTCTTGGTCAGATTCC	58	514
16	20112199	20112717	MITF	4	MITF_Ex4_F	ATGTCAAAGGGAACTGGAGA	MITF_Ex4_R	GGAGGAAGAGGACGGTTACT	57	519
16	20105065	20105533	MITF	5	MITF_Ex5F2	GGAGTAATGGTGCTGTGGAG	MITF_Ex5R2	TCCCAGAACCAAACCAAGTA	58	469
16	20103027	20103521	MITF	6	MITF_Ex6F2	GTCGGTGTGTATCACGAGGT	MITF_Ex6R2	GGGAACATCAACTCCAACAT	58	495
16	20097720	20098100	MITF	7	MITF_Ex7F2	GCCCTTTCCTCTGCTCTTTT	MITF_Ex7R2	GAAAGCCACTTCCAAACA	60	381
16	20094450	20094678	MITF	8	MITF_Ex8_F2	GGTCTGTTTTCTTCCATTTTCA	MITF_Ex8_R2	CCATCTCAAAGTCAGGAGCA	58	229
16	20089337	20090185	MITF	9	MITF_Ex9a_F2	TCCTCATTGTGAACATTACGTC	MITF_Ex9a_R2	TTACACCAACCGGAGAAAGA	58	849
16	20089189	20089513	MITF	9	MITF_Ex9b_F2	AGCATCACGCAGACCTAACT	MITF_Ex9b_R2	CTACTAATCAAGAAAGGAAGCAGTC	58	325
17	50624537	50624742	EDNRB	2	EDNRB_P2_F	GTGCGAAAGAACCATCGAG	EDNRB_P2_R	TGATGGGGATGTCAATGATG	59	206
21	30664227	30664776	SLC45A2	1	MATP_Ex1_F	CCAGGCTCTATGTCAAATCCA	MATP_Ex1_R	TTCGCACTCTCCTTCTATGG	58	550
21	30666091	30666788	SLC45A2	2	MATP_Ex2_F	TCTGCTTCGTTGGAATGGT	MATP_Ex2_R	TGTAAGAACCTCCCTGTCTGG	59	698
21	30681277	30681830	SLC45A2	3	MATP_Ex3_F	ATGATGAAAGGGAGAGAGTCC	MATP_EX3_R	GCTACTGGGGATTTGAGGAT	58	554
21	30685287	30685873	SLC45A2	4	MATP_Ex4_F	TCCAGTCCCTTCACCCTTA	MATP_Ex4_R	GGTCCCATAGTGTCCTCTCA	58	587
21	30686209	30686752	SLC45A2	5	MATP_Ex5_F	TGAAAGAATGAAAGGGGTGA	MATP_Ex5_R	ATCCAACTCCAGCAGAACAG	58	544
21	30690221	30690627	SLC45A2	6	MATP_Ex6_F2	TTTCAAGCACAGATAGGGAAG	MATP_Ex6_R2	GTCCAGATGTTACCCAGCAC	58	407
21	30692915	30693453	SLC45A2	7	MATP_Ex7_F	AATGCTGTTCCTGTGTTTCC	MATP_Ex7_R	AAAAGAGACCCCGCTCCT	58	539
